# Supplementary material
Source: PubMed Central journal article supplement (PMC3399030)
Supplement: NIHMS376671-supplement-Supplemental_Material.pdf [file NIHMS376671-supplement-Supplemental_Material.pdf]

**Supplementary Table 1. Allele frequencies and results from the association analyses for SNPs with association results not reaching nominal significance with consistent effect sizes in the replication.**

| Chr                   | SNP                | Position    | Locus                    | Alleles               | Genome-wide analysis                |                         |         |                  | Replication analysis                |           |           |                      |                          |            |                        |
|-----------------------|--------------------|-------------|--------------------------|-----------------------|-------------------------------------|-------------------------|---------|------------------|-------------------------------------|-----------|-----------|----------------------|--------------------------|------------|------------------------|
|                       |                    |             |                          |                       | Allele frequencies (Cases/Controls) |                         |         |                  | Allele frequencies (Cases/Controls) |           |           | P-value <sup>†</sup> | OR (95% CI) <sup>†</sup> | BD P-value | SNP selection strategy |
| Scandinavia (332/262) | Germany (383/2700) | P-value*    | OR (95% CI)*             | Scandinavia (289/820) | Central Europe (561/2063)           | United States (371/625) |         |                  |                                     |           |           |                      |                          |            |                        |
| 1                     | rs2377570          | 31,071,356  | <i>SDC3/SNORD85</i>      | A/G                   | 0.26/0.19                           | 0.27/0.22               | 6.3E-05 | 1.34 (1.55-1.16) | 0.23/0.20                           | 0.20/0.21 | 0.22/0.22 | 0.82                 | 1.01 (0.90-1.14)         | 0.29       | II                     |
| 1                     | rs12144426         | 164,418,658 | <i>FAM78B</i>            | T/A                   | 0.24/0.31                           | 0.21/0.25               | 3.5E-05 | 0.72 (0.62-0.84) | 0.25/0.27                           | 0.24/0.24 | 0.26/0.24 | 0.94                 | 1.00 (0.89-1.11)         | 0.48       | II                     |
| 2                     | rs1990760          | 162,832,297 | <i>IFIH1</i>             | C/T                   | 0.39/0.38                           | 0.44/0.39               | 0.0070  | 1.21 (1.39-1.05) | 0.37/0.37                           | 0.40/0.38 | 0.41/0.41 | 0.72                 | 1.02 (0.92-1.12)         | 0.76       | I                      |
| 3                     | rs7638558          | 60,020,841  | <i>FHIT</i>              | C/T                   | 0.02/0.00                           | 0.04/0.02               | 3.6E-05 | 2.35 (3.52-1.57) | 0.01/0.00                           | 0.02/0.01 | 0.01/0.02 | 0.83                 | 1.04 (0.69-1.57)         | 0.24       | II                     |
| 3                     | rs983513           | 79,277,847  | <i>ROBO1</i>             | G/A                   | 0.45/0.53                           | 0.39/0.45               | 2.5E-05 | 0.75 (0.65-0.86) | 0.48/0.49                           | 0.48/0.46 | 0.49/0.48 | 0.30                 | 1.05 (0.96-1.16)         | 0.55       | II                     |
| 4                     | rs17005387         | 123,156,648 | <i>KIAA1109/IL2/IL21</i> | A/G                   | 0.02/0.01                           | 0.03/0.02               | 2.6E-05 | 2.41 (3.63-1.60) | 0.01/0.02                           | 0.02/0.02 | 0.03/0.02 | 0.34                 | 1.19 (0.84-1.67)         | 0.26       | II                     |
| 4                     | rs993704           | 125,931,510 | <i>ANKRD50</i>           | A/G                   | 0.30/0.24                           | 0.36/0.30               | 2.3E-05 | 1.35 (1.54-1.17) | 0.26/0.26                           | 0.32/0.30 | 0.27/0.27 | 0.29                 | 1.06 (0.95-1.18)         | 0.78       | II                     |
| 4                     | rs10857102         | 125,937,433 | <i>ANKRD50</i>           | A/G                   | 0.26/0.20                           | 0.30/0.25               | 3.2E-05 | 1.36 (1.57-1.18) | 0.25/0.25                           | 0.31/0.29 | 0.26/0.26 | 0.23                 | 1.07 (0.96-1.19)         | 0.78       | II                     |
| 5                     | rs1000113          | 150,220,269 | <i>IRGM</i>              | T/C                   | 0.07/0.08                           | 0.05/0.07               | 0.015   | 0.72 (0.56-0.94) | 0.07/0.07                           | 0.07/0.07 | 0.08/0.08 | 0.74                 | 1.03 (0.86-1.24)         | 0.86       | I                      |
| 5                     | rs11747270         | 150,239,060 | <i>IRGM</i>              | G/A                   | 0.07/0.08                           | 0.05/0.08               | 0.021   | 0.74 (0.58-0.96) | 0.07/0.07                           | 0.07/0.07 | 0.08/0.08 | 0.81                 | 1.02 (0.85-1.23)         | 0.88       | I                      |
| 6                     | rs394683           | 5,043,412   | <i>LYRM4</i>             | C/T                   | 0.26/0.31                           | 0.24/0.30               | 2.2E-05 | 0.73 (0.85-0.63) | 0.26/0.29                           | 0.30/0.28 | 0.26/0.30 | 0.37                 | 0.95 (0.86-1.06)         | 0.036      | II                     |
| 6                     | rs4713859          | 35,514,131  | <i>PPARD/FANCE</i>       | C/T                   | 0.02/0.03                           | 0.02/0.05               | 5.3E-05 | 0.43 (0.65-0.29) | 0.03/0.03                           | 0.05/0.05 | 0.05/0.06 | 0.81                 | 1.03 (0.82-1.29)         | 0.67       | II                     |
| 7                     | rs590099           | 18,302,863  | <i>HDAC9</i>             | A/G                   | 0.16/0.13                           | 0.21/0.16               | 2.6E-05 | 1.42 (1.67-1.20) | 0.13/0.17                           | 0.16/0.17 | 0.17/0.16 | 0.13                 | 0.90 (0.79-1.03)         | 0.16       | II                     |
| 7                     | rs17806432         | 76,798,820  | <i>PION/FGL2</i>         | T/C                   | 0.14/0.11                           | 0.15/0.11               | 1.2E-05 | 1.59 (1.29-1.95) | 0.13/0.10                           | 0.10/0.11 | 0.11/0.08 | 0.27                 | 1.09 (0.94-1.27)         | 0.11       | II                     |
| 7                     | rs6979188          | 76,821,451  | <i>PION/FGL2</i>         | T/C                   | 0.10/0.06                           | 0.10/0.06               | 2.1E-05 | 1.64 (1.30-2.05) | 0.07/0.07                           | 0.07/0.07 | 0.08/0.06 | 0.49                 | 1.07 (0.89-1.28)         | 0.68       | II                     |
| 8                     | rs10156297         | 127,621,008 | <i>FAM84B</i>            | C/A                   | 0.16/0.13                           | 0.18/0.12               | 6.8E-05 | 1.42 (1.20-1.70) | 0.13/0.12                           | 0.12/0.13 | 0.13/0.12 | 0.86                 | 0.99 (0.86-1.14)         | 0.23       | II                     |
| 11                    | rs11218714         | 122,000,841 | <i>UBASH3B</i>           | G/A                   | 0.30/0.35                           | 0.27/0.34               | 3.2E-05 | 0.75 (0.65-0.86) | 0.32/0.31                           | 0.31/0.31 | 0.33/0.31 | 0.77                 | 1.02 (0.92-1.12)         | 0.61       | II                     |
| 11                    | rs722449           | 132,656,146 | <i>OPCML</i>             | A/G                   | 0.06/0.03                           | 0.08/0.04               | 8.8E-06 | 1.82 (2.36-1.40) | 0.04/0.05                           | 0.05/0.04 | 0.04/0.05 | 0.74                 | 1.04 (0.83-1.30)         | 0.45       | II                     |
| 12                    | rs3764021          | 9,724,895   | <i>CLEC2D</i>            | T/C                   | 0.41/0.45                           | 0.45/0.47               | 0.032   | 0.87 (0.77-0.99) | 0.45/0.46                           | 0.47/0.47 | 0.44/0.48 | 0.36                 | 0.96 (0.87-1.05)         | 0.38       | I                      |
| 12                    | rs608418           | 10,023,132  | <i>CLEC12A</i>           | T/C                   | 0.57/0.47                           | 0.55/0.49               | 1.4E-05 | 1.32 (1.17-1.50) | 0.52/0.50                           | 0.49/0.48 | 0.50/0.50 | 0.49                 | 1.03 (0.94-1.14)         | 0.90       | II                     |
| 12                    | rs2117032          | 20,965,389  | <i>SLCO1B3</i>           | C/T                   | 0.35/0.31                           | 0.38/0.35               | 0.045   | 1.15 (1.31-1.00) | 0.35/0.35                           | 0.34/0.36 | 0.39/0.38 | 0.73                 | 0.98 (0.89-1.08)         | 0.54       | I                      |
| 13                    | rs9576711          | 38,521,621  | <i>STOML3</i>            | T/G                   | 0.11/0.15                           | 0.06/0.10               | 2.3E-05 | 0.60 (0.48-0.76) | 0.11/0.13                           | 0.12/0.08 | 0.09/0.11 | 0.39                 | 1.07 (0.92-1.24)         | 2.6E-04    | II                     |
| 13                    | rs1413040          | 38,605,939  | <i>STOML3</i>            | A/G                   | 0.26/0.34                           | 0.22/0.26               | 9.8E-05 | 0.74 (0.86-0.64) | 0.30/0.30                           | 0.33/0.27 | 0.28/0.30 | 0.041                | 1.11 (1.00-1.23)         | 0.027      | II                     |
| 15                    | rs289404           | 83,367,321  | <i>PDE8A</i>             | G/T                   | 0.15/0.21                           | 0.14/0.18               | 6.5E-05 | 0.69 (0.83-0.57) | 0.19/0.20                           | 0.21/0.23 | 0.24/0.25 | 0.078                | 0.90 (0.81-1.01)         | 0.70       | II                     |
| 16                    | rs9888739          | 31,220,754  | <i>ITGAM</i>             | T/C                   | 0.11/0.13                           | 0.10/0.12               | 0.026   | 0.78 (0.63-0.97) | 0.09/0.10                           | 0.10/0.11 | 0.12/0.12 | 0.61                 | 0.96 (0.82-1.12)         | 0.88       | I                      |
| 16                    | rs7190071          | 71,742,579  | <i>ZFHX3</i>             | T/C                   | 0.39/0.30                           | 0.35/0.30               | 6.9E-06 | 1.39 (1.20-1.60) | 0.34/0.37                           | 0.33/0.36 | 0.34/0.35 | 0.026                | 0.89 (0.81-0.99)         | 0.62       | II                     |
| 18                    | rs4310957          | 69,756,844  | <i>FBXO15</i>            | G/T                   | 0.32/0.24                           | 0.31/0.27               | 9.0E-06 | 1.42 (1.65-1.21) | 0.29/0.32                           | 0.28/0.28 | 0.31/0.30 | 0.81                 | 0.99 (0.89-1.10)         | 0.56       | II                     |
| 20                    | rs6080774          | 17,600,784  | <i>RRBP1</i>             | A/G                   | 0.04/0.03                           | 0.06/0.04               | 6.1E-05 | 2.20 (3.24-1.50) | 0.02/0.02                           | 0.03/0.02 | 0.02/0.02 | 0.077                | 1.32 (0.97-1.81)         | 0.70       | II                     |

**Supplementary Table 2. Genome-wide association studies on immune-mediated and chronic inflammatory traits taken into consideration in SNP prioritization strategy 1.**

| <b>Disease/Trait</b>                              | <b>First Author</b>                                             | <b>Journal</b>                | <b>PubMed ID</b> |
|---------------------------------------------------|-----------------------------------------------------------------|-------------------------------|------------------|
| <b>AIDS</b>                                       | Le Clerc                                                        | <i>J Infect Dis</i>           | 19754311         |
| <b>AIDS (progression)</b>                         | Limou                                                           | <i>J Infect Dis</i>           | 19115949         |
| <b>Ankylosing spondylitis</b>                     | The Australo-Anglo-American Spondyloarthritis Consortium (TASC) | <i>Nat Genet</i>              | 20062062         |
| <b>Anti-cyclic Citrullinated Peptide Antibody</b> | Cui                                                             | <i>Mol Med</i>                | 19287509         |
| <b>Arthritis (juvenile idiopathic)</b>            | Hinks                                                           | <i>Arthritis Rheum</i>        | 19116933         |
|                                                   | Behrens                                                         | <i>Arthritis Rheum</i>        | 18576341         |
| <b>Asthma</b>                                     | Sleiman                                                         | <i>N Engl J Med</i>           | 20032318         |
|                                                   | Mathias                                                         | <i>J Allergy Clin Immunol</i> | 19910028         |
|                                                   | Himes                                                           | <i>Am J Hum Genet</i>         | 19426955         |
|                                                   | Moffatt                                                         | <i>Nature</i>                 | 17611496         |
|                                                   | Li                                                              | <i>J Allergy Clin Immunol</i> | 20159242         |
| <b>Asthma (childhood onset)</b>                   | Hancock                                                         | <i>PLoS Genet</i>             | 19714205         |
| <b>Asthma (toluene diisocyanate-induced)</b>      | Kim                                                             | <i>Clin Exp Allergy</i>       | 19187332         |
| <b>Atopic dermatitis</b>                          | Esparza-Gordillo                                                | <i>Nat Genet</i>              | 19349984         |
| <b>Atopy</b>                                      | Castro-Giner                                                    | <i>BMC Med Genet</i>          | 19961619         |
| <b>Behcet's disease</b>                           | Fei                                                             | <i>Arthritis Res Ther</i>     | 19442274         |
| <b>Bilirubin levels</b>                           | Sanna                                                           | <i>Hum Mol Genet</i>          | 19419973         |
| <b>Biochemical measures</b>                       | Zemunik                                                         | <i>Croat Med J</i>            | 19260141         |
| <b>Celiac disease</b>                             | Hunt                                                            | <i>Nat Genet</i>              | 18311140         |
|                                                   | van Heel                                                        | <i>Nat Genet</i>              | 17558408         |
|                                                   | Dubois                                                          | <i>Nat Genet</i>              | 20190752         |
| <b>Chronic Hepatitis C infection</b>              | Rauch                                                           | <i>Gastroenterology</i>       | 20060832         |
| <b>Chronic Obstructive Pulmonary Disease</b>      | Pillai                                                          | <i>PLoS Genet</i>             | 19300482         |
|                                                   | Cho                                                             | <i>Nat Genet</i>              | 20173748         |
| <b>C-reactive protein</b>                         | Elliott                                                         | <i>JAMA</i>                   | 19567438         |
|                                                   | Reiner                                                          | <i>Am J Hum Genet</i>         | 18439552         |
|                                                   | Ridker                                                          | <i>Am J Hum Genet</i>         | 18439548         |
| <b>Crohn's disease</b>                            | Barrett                                                         | <i>Nat Genet</i>              | 18587394         |
|                                                   | Raelson                                                         | <i>Proc Natl Acad Sci USA</i> | 17804789         |
|                                                   | Franke                                                          | <i>PLoS ONE</i>               | 17684544         |
|                                                   | WTCCC                                                           | <i>Nature</i>                 | 17554300         |
|                                                   | Parkes                                                          | <i>Nat Genet</i>              | 17554261         |
|                                                   | Libioulle                                                       | <i>PLoS Genet</i>             | 17447842         |
| <b>Crohn's disease and Sarcoidosis (combined)</b> | Franke                                                          | <i>Gastroenterology</i>       | 18723019         |

|                                                   |              |                        |          |
|---------------------------------------------------|--------------|------------------------|----------|
| <b>Cystic fibrosis severity</b>                   | Gu           | <i>Nature</i>          | 19242412 |
| <b>Diabetic nephropathy</b>                       | Pezzolesi    | <i>Diabetes</i>        | 19252134 |
| <b>Drug-induced liver injury (flucloxacillin)</b> | Daly         | <i>Nat Genet</i>       | 19483685 |
| <b>Eosinophilic esophagitis (pediatric)</b>       | Rothenberg   | <i>Nat Genet</i>       | 20208534 |
| <b>Gallstones</b>                                 | Buch         | <i>Nat Genet</i>       | 17632509 |
| <b>Hematological and biochemical traits</b>       | Kamatani     | <i>Nat Genet</i>       | 20139978 |
| <b>Hepatitis B</b>                                | Kamatani     | <i>Nat Genet</i>       | 19349983 |
| <b>HIV-1 control</b>                              | Fellay       | <i>PLoS Genet</i>      | 20041166 |
| <b>HIV-1 viral setpoint</b>                       | Fellay       | <i>Science</i>         | 17641165 |
| <b>Idiopathic pulmonary fibrosis</b>              | Mushiroda    | <i>J Med Genet</i>     | 18835860 |
| <b>Inflammatory bowel disease</b>                 | Kugathasan   | <i>Nat Genet</i>       | 18758464 |
|                                                   | Duerr        | <i>Science</i>         | 17068223 |
| <b>Inflammatory bowel disease (early onset)</b>   | Imielinski   | <i>Nat Genet</i>       | 19915574 |
| <b>Kawasaki disease</b>                           | Burgner      | <i>PLoS Genet</i>      | 19132087 |
| <b>Knee osteoarthritis</b>                        | Nakajima     | <i>PLoS One</i>        | 20305777 |
| <b>Leprosy</b>                                    | Zhang        | <i>N Engl J Med</i>    | 20018961 |
| <b>Lupus</b>                                      | Cervino      | <i>Ann NY Acad Sci</i> | 17911428 |
| <b>Malaria</b>                                    | Jallow       | <i>Nat Genet</i>       | 19465909 |
| <b>Multiple Sclerosis</b>                         | Bahlo        | <i>Nat Genet</i>       | 19525955 |
|                                                   | De Jager     | <i>Nat Genet</i>       | 19525953 |
|                                                   | Baranzini    | <i>Hum Mol Genet</i>   | 19010793 |
|                                                   | Aulchenko    | <i>Nat Genet</i>       | 18997785 |
|                                                   | Comabella    | <i>PLoS ONE</i>        | 18941528 |
|                                                   | Hafler       | <i>N Engl J Med</i>    | 17660530 |
|                                                   | Jakkula      | <i>Am J Hum Genet</i>  | 20159113 |
| <b>Multiple Sclerosis (age of onset)</b>          | Baranzini    | <i>Hum Mol Genet</i>   | 19010793 |
| <b>Multiple Sclerosis (severity)</b>              | Baranzini    | <i>Hum Mol Genet</i>   | 19010793 |
| <b>Neuromyelitis optica</b>                       | Kim          | <i>Neurobiol Dis</i>   | 19850125 |
| <b>Neutrophil count</b>                           | Okada        | <i>Hum Mol Genet</i>   | 20172861 |
| <b>Osteoarthritis</b>                             | Zhai         | <i>J Med Genet</i>     | 19508968 |
|                                                   | Kerkhof      | <i>Arthritis Rheum</i> | 20112360 |
| <b>Periodontitis</b>                              | Schaefer     | <i>Hum Mol Genet</i>   | 19897590 |
| <b>Plasma levels of liver enzymes</b>             | Yuan         | <i>Am J Hum Genet</i>  | 18940312 |
| <b>Primary biliary cirrhosis</b>                  | Hirschfield  | <i>N Engl J Med</i>    | 19458352 |
| <b>Psoriasis</b>                                  | Nair         | <i>Nat Genet</i>       | 19169254 |
|                                                   | Zhang        | <i>Nat Genet</i>       | 19169255 |
|                                                   | Liu          | <i>PLoS Genet</i>      | 18369459 |
|                                                   | Capon        | <i>Hum Mol Genet</i>   | 18364390 |
| <b>Rheumatoid arthritis</b>                       | Gregersen    | <i>Nat Genet</i>       | 19503088 |
|                                                   | Raychaudhuri | <i>Nat Genet</i>       | 18794853 |
|                                                   | Julia        | <i>Arthritis Rheum</i> | 18668548 |
|                                                   | Plenge       | <i>Nat Genet</i>       | 17982456 |
|                                                   | Plenge       | <i>N Engl J Med</i>    | 17804836 |

|                                             |            |                                      |          |
|---------------------------------------------|------------|--------------------------------------|----------|
|                                             | WTCCC      | <i>Nature</i>                        | 17554300 |
| <b>Sarcoidosis</b>                          | Hofmann    | <i>Nat Genet</i>                     | 18690218 |
| <b>Serum bilirubin levels</b>               | Johnson    | <i>Hum Mol Genet</i>                 | 19414484 |
| <b>Serum soluble E-selectin</b>             | Paterson   | <i>Arterioscler Thromb Vasc Biol</i> | 19729612 |
| <b>Soluble leptin receptor levels</b>       | Sun        | <i>Hum Mol Genet</i>                 | 20167575 |
| <b>Soluble levels of adhesion molecules</b> | Barbalic   | <i>Hum Mol Genet</i>                 | 20167578 |
| <b>Systemic lupus erythematosus</b>         | Han        | <i>Nat Genet</i>                     | 19838193 |
|                                             | Graham     | <i>Nat Genet</i>                     | 18677312 |
|                                             | Harley     | <i>Nat Genet</i>                     | 18204446 |
|                                             | Hom        | <i>N Engl J Med</i>                  | 18204098 |
|                                             | Kozyrev    | <i>Nat Genet</i>                     | 18204447 |
|                                             | Yang       | <i>PLoS Genet</i>                    | 20169177 |
| <b>Systemic sclerosis</b>                   | Zhou       | <i>Arthritis Rheum</i>               | 19950302 |
| <b>Type 1 diabetes</b>                      | Wallace    | <i>Nat Genet</i>                     | 19966805 |
|                                             | Barrett    | <i>Nat Genet</i>                     | 19430480 |
|                                             | Cooper     | <i>Nat Genet</i>                     | 18978792 |
|                                             | Grant      | <i>Diabetes</i>                      | 18840781 |
|                                             | Hakonarson | <i>Diabetes</i>                      | 18198356 |
|                                             | Hakonarson | <i>Nature</i>                        | 17632545 |
|                                             | Todd       | <i>Nat Genet</i>                     | 17554260 |
| <b>Ulcerative colitis</b>                   | Asano      | <i>Nat Genet</i>                     | 19915573 |
|                                             | Barrett    | <i>Nat Genet</i>                     | 19915572 |
|                                             | Silverberg | <i>Nat Genet</i>                     | 19122664 |
|                                             | Franke A   | <i>Nat Genet</i>                     | 20228798 |
|                                             | McGovern   | <i>Nat Genet</i>                     | 20228799 |
|                                             | Franke     | <i>Nat Genet</i>                     | 18836448 |
| <b>Vitiligo</b>                             | Birlea     | <i>J Invest Dermatol</i>             | 19890347 |

The table lists all the genome-wide association studies on immune-mediated and chronic inflammatory traits that were taken into consideration in SNP prioritization strategy 1. The studies were identified using the Catalog of Genome-Wide Association Studies (<http://www.genome.gov/26525384>) (accessed 23.04.2010) [36].

**Supplementary Table 3. Evaluation of abundance patterns in the major phyla via Kruskal- Wallis and *post hoc* Mann-Whitney U tests.**

| Phylum         | Factor          | df | $\chi^2$ | P-Value | <u><i>post hoc</i> test (MWU)</u> |       |         |
|----------------|-----------------|----|----------|---------|-----------------------------------|-------|---------|
|                |                 |    |          |         | Factor*                           | W     | P-Value |
| Firmicutes     | Secretor status | 1  | 3,725    | 0.054   | NA <sup>†</sup>                   |       |         |
| Proteobacteria | Secretor status | 1  | 7,303    | 0.007   | NA                                |       |         |
| Proteobacteria | Genotype        | 2  | 7,323    | 0.026   | AA - AG                           | 49    | 0.019   |
|                |                 |    |          |         | GG - AA                           | 12    | 0.015   |
|                |                 |    |          |         | GG - AG                           | 85    | 0.981   |
| Bacteroidetes  | Secretor status | 1  | 0,648    | 0.421   | NA                                |       |         |
| Actinobacteria | Genotype        | 2  | 6,344    | 0.042   | AA - AG                           | 120   | 0.539   |
|                |                 |    |          |         | GG - AA                           | 25    | 0.197   |
|                |                 |    |          |         | GG - AG                           | 30    | 0.009   |
| Tenericutes    | Genotype        | 2  | 7,023    | 0.030   | AA - AG                           | 143.5 | 0.092   |
|                |                 |    |          |         | GG - AA                           | 25    | 0.193   |
|                |                 |    |          |         | GG - AG                           | 38.5  | 0.021   |

\*Genotype at the SNP rs601338 with G being the functional allele.

<sup>†</sup>Test not applied.

MWU, Mann-Whitney U

**Supplementary Table 4. Analysis of alpha diversity via linear modeling.**

| Alpha diversity        | Factor   | df | F-Value | P-Value | <u>post hoc Tukey-HSD</u> |         |
|------------------------|----------|----|---------|---------|---------------------------|---------|
|                        |          |    |         |         | Factor*                   | P-Value |
| ACE                    | Genotype | 2  | 3.015   | 0.062   | AA - AG                   | 0.657   |
|                        |          |    |         |         | GG - AA                   | 0.334   |
|                        |          |    |         |         | GG - AG                   | 0.049   |
| Phylogenetic Diversity | Genotype | 2  | 3.930   | 0.029   | AA - AG                   | 0.553   |
|                        |          |    |         |         | GG - AA                   | 0.259   |
|                        |          |    |         |         | GG - AG                   | 0.022   |

\*Genotype at the SNP rs601338 with G being the functional allele.

**Supplementary Figure 1. Regional association plots for additional nominally replicated**

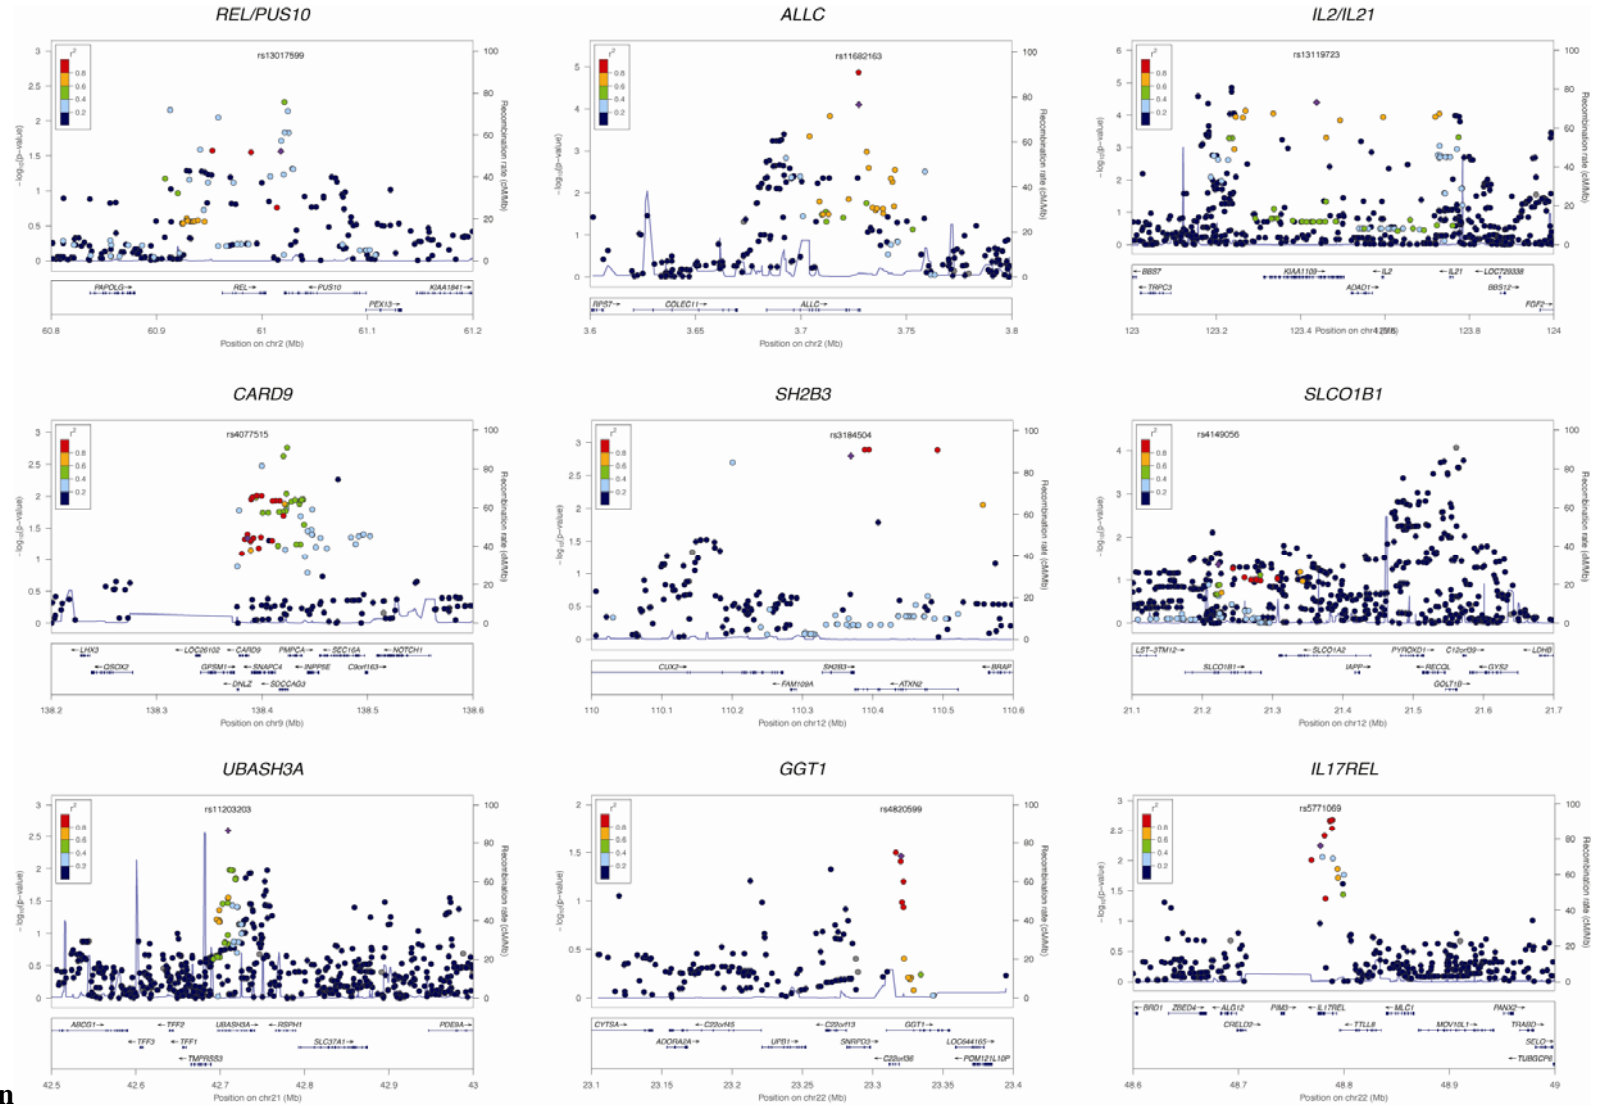

**region**

Association results from the genetic regions with nominally replicated SNPs not shown in Figure 1 in the main manuscript. The plots were generated using the LocusZoom software [8]. The association results for both the genotyped and imputed SNPs are represented by the  $-\log_{10} P$ -

value plotted against the genomic position. The index SNP is marked out with a purple diamond while the colors of the remaining SNPs indicated the linkage disequilibrium (LD) with the index SNP. The recombination rates were derived from the HapMap project and are represented by the thin blue lines.



**Supplementary Figure 2. Sequence analysis for a segment of human FUT2 containing Gly247.**

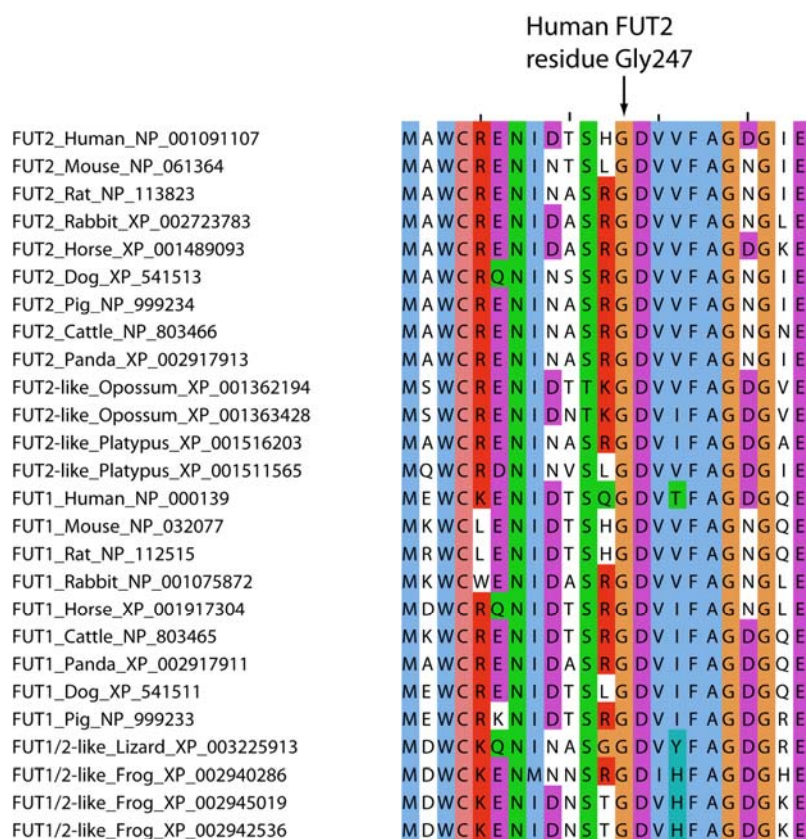

A multiple sequence alignment of residues 235-257 of human FUT2 and homologous sequences from tetrapods shows Gly247 to be evolutionary conserved in both FUT2 and FUT1 in mammals, lizard and frogs, strongly suggesting functional importance. The sequences were obtained from the RefSeq protein sequence database [36]. Fold recognition modeling with Phyre [37] indicates that the *Bradyrhizobium* NodZ fucosyltransferase [38] is the closest homolog of FUT2 with a known 3D structure and that FUT2 Gly247 is localized in the active site of the enzyme, in the second loop of the conserved  $\beta$ - $\alpha$ - $\beta$  glycogen phosphorylase/glycosyltransferase (GPGTF) motif described by Wrabl and Grishin [39].



The figures demonstrate GRAIL [31] output results visualized with the VIZ-GRAIL software [33]. Outer circle boxes represent lead SNPs previously or currently identified as suggestive or robust PSC susceptibility loci used as input for the GRAIL analysis (see Supplementary Methods). Inner circle represents genes and genomic regions defined by the outer circle lead SNPs that were identified in the GRAIL analysis based on LD characteristics, genes scored to a  $P_{\text{text}} < 0.05$  in the GRAIL analysis are indicated in bold. The lines between the inner circle genes represent functionally related genes within different loci, the thickness of lines is proportional to the relative similarity of the genes connected by the lines and inversely proportional to the number of genes within the loci that the genes are derived from.

(A) GRAIL pathway analysis based on PubMed abstracts published prior to December 2006.

(B) GRAIL pathway analysis based on PubMed abstracts published prior to April 2011.

**Supplementary Figure 4. Influence of *FUT2* genotype on beta diversity**

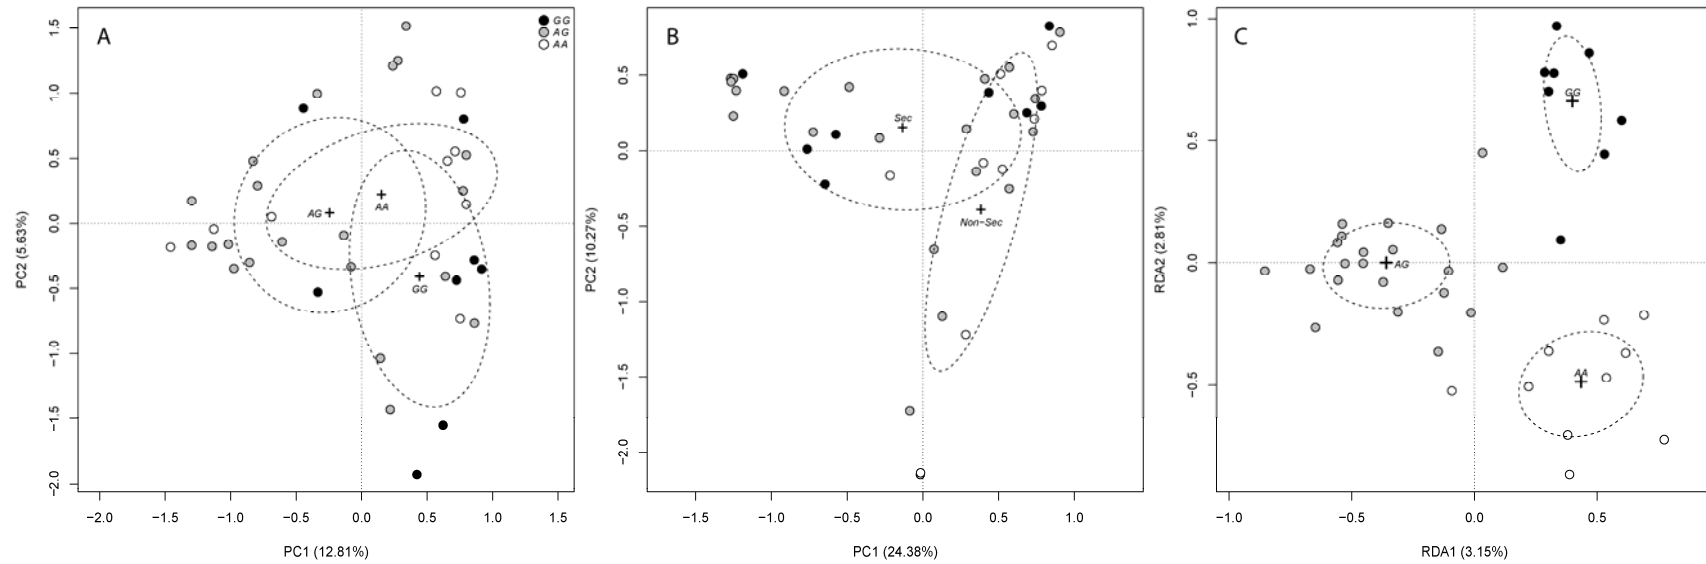

(A) PCoAs of the unweighted UniFrac metric based on presence/absence of phylogenetic branches and (B) normalized weighted UniFrac incorporating the abundances of phylogenetic branches. Centroids were positioned and evaluated using an iterative approach and clusters are denoted by the standard deviation of the weighted averages (dashed ellipses) around the centroids (unweighted UniFrac:  $r^2=0.110$ ,  $P=0.074$ ; normalized weighted UniFrac:  $r^2=0.104$ ,  $P=0.016$ ). (C) Community relationship (99% OTUs) in an environment spanned only by *FUT2* genotypes explains 5.96% of the total variation in the bacterial species distribution (Redundancy Analysis:  $F=1.140$ ,  $P=0.085$ ; RDA1:  $F=1.206$ ,  $P=0.093$ ; RDA2:  $F=1.075$ ,  $P=0.266$ ).
